# Supplementary material for: Novel prognostic marker PRMT1 regulates cell growth via downregulation of CDKN1A in HCC
Source: PubMed Central journal article supplement (PMC5777784; doi:10.18632/oncotarget.23296), 2017-12-14
Supplement: oncotarget-08-115444-s001.pdf [file oncotarget-08-115444-s001.pdf]

# Novel prognostic marker PRMT1 regulates cell growth via downregulation of CDKN1A in HCC

## SUPPLEMENTARY MATERIALS

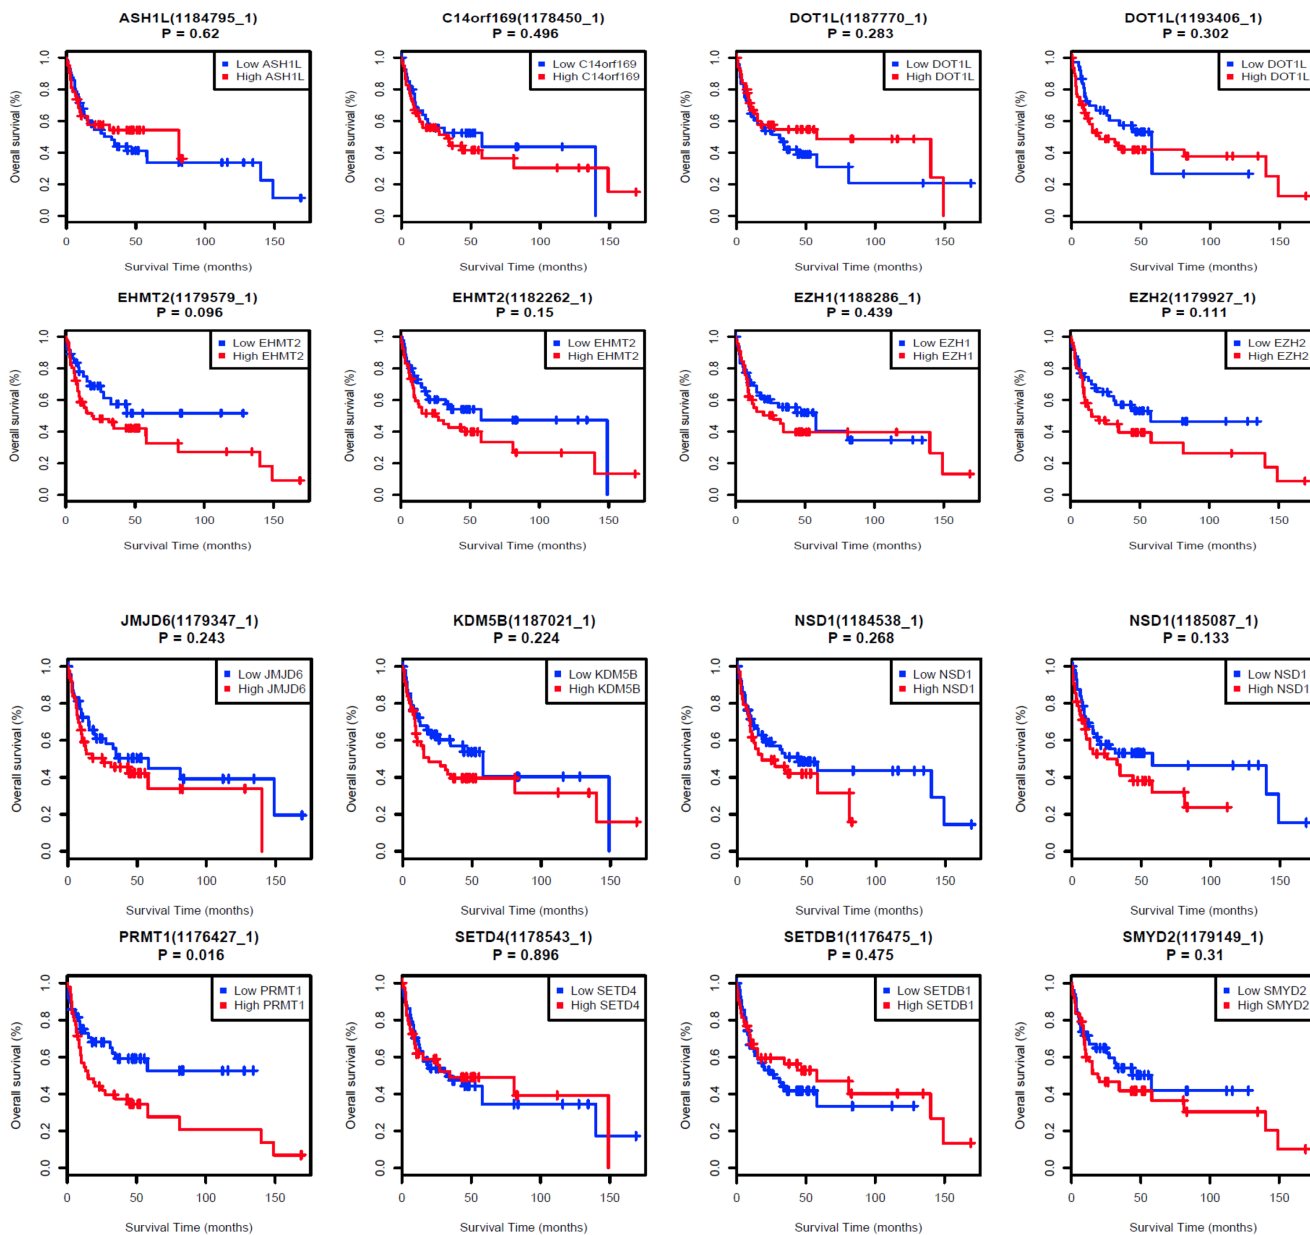

(Continued)

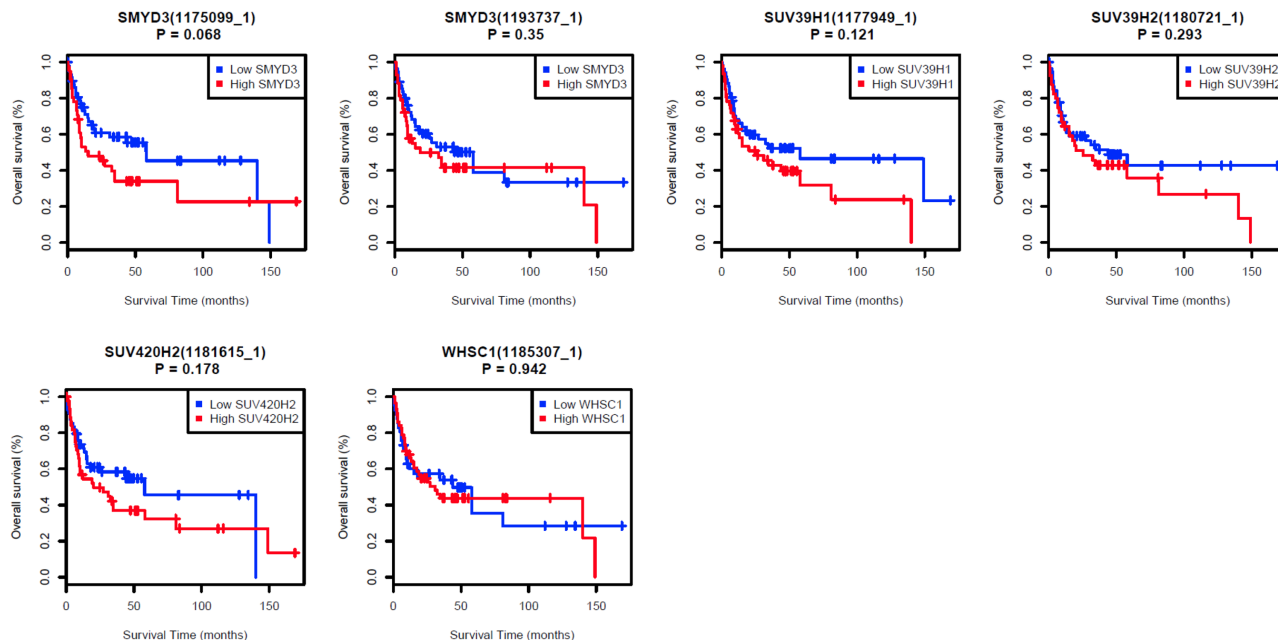

**Supplementary Figure 1: Prognostic value estimation of 20 histone methyltransferases in hepatocellular carcinoma patients in the NCI cohort.** Among the 20 genes, the probes corresponding to *KMT2B* and *KMT2D* did not exist in the microarray data of the NCI cohort. Therefore, remained 18 genes (22 probes) were applied to this survival analysis. Each *P*-value was obtained by a log-rank test. The number in the bracket beside the gene symbol indicates the unique identifier of the microarray data in the cohort.

Supplementary Table 1: Baseline characteristics of hepatocellular carcinoma patient cohorts

| Variables                | NCI cohort | Korean cohort | Fudan cohort |
|--------------------------|------------|---------------|--------------|
| Patients (n)             | 99         | 100           | 242          |
| Gender, n (%)            |            |               |              |
| Male                     | 77 (77.8)  | 83 (83)       | 211 (87.2)   |
| Female                   | 22 (22.2)  | 17 (17)       | 31 (12.8)    |
| Age (years)              |            |               |              |
| Median                   | 53         | 55            | 50           |
| Range                    | 26-77      | 25-70         | 21-77        |
| HPV, n (%)               |            |               |              |
| +                        | 49 (49.5)  | 58 (58)       | 218 (90.1)   |
| -                        | 50 (50.5)  | 17 (17)       | 6 (2.5)      |
| NA                       |            | 25 (25)       | 18 (7.4)     |
| AFP (>300 ng/mL), n (%)  |            |               |              |
| +                        | 49 (49.5)  | 32 (32)       | 110 (45.5)   |
| -                        | 45 (45.4)  | 68 (68)       | 128 (52.9)   |
| NA                       | 5 (5.1)    |               | 4 (1.6)      |
| AJCC stage, n (%)        |            |               |              |
| I                        |            | 35 (35)       | 96 (39.7)    |
| II                       |            | 17 (17)       | 78 (32.2)    |
| III                      |            | 48 (48)       | 51 (21.1)    |
| IV                       |            | 0 (0)         | 0 (0)        |
| NA                       | 99 (100)   |               | 17 (7)       |
| BCLC stage, n (%)        |            |               |              |
| O                        |            | 0 (0)         | 20 (8.3)     |
| A                        |            | 53 (53)       | 152 (62.8)   |
| B                        |            | 37 (37)       | 24 (9.9)     |
| C                        |            | 6 (6)         | 29 (12)      |
| D                        |            | 4 (4)         | 0 (0)        |
| NA                       | 99 (100)   |               | 17(7)        |
| Death, n                 | 54         | 43            | 96           |
| Median follow-up (month) | 20.5       | 48.5          | 51.7         |

Abbreviations: HBV, hepatitis B virus; AFP, alpha-fetoprotein; AJCC, American Joint Committee on Cancer; BCLC, Barcelona Clinic Liver Cancer; NA, not available.

**Supplementary Table 2: Prognostic values of 20 histone methyltransferases for overall survival of hepatocellular carcinoma patients in the NCI cohort**

| Gene symbol      | Probe ID  | P-value* |
|------------------|-----------|----------|
| <i>PRMT1</i>     | 1176427_1 | 0.016    |
| <i>SMYD3</i>     | 1175099_1 | 0.068    |
| <i>EHMT2</i>     | 1179579_1 | 0.096    |
| <i>EZH2</i>      | 1179927_1 | 0.111    |
| <i>SUV39H1</i>   | 1177949_1 | 0.121    |
| <i>NSD1</i>      | 1185087_1 | 0.133    |
| <i>EHMT2</i>     | 1182262_1 | 0.15     |
| <i>SUV420H2</i>  | 1181615_1 | 0.178    |
| <i>KDM5B</i>     | 1187021_1 | 0.224    |
| <i>JMJD6</i>     | 1179347_1 | 0.243    |
| <i>NSD1</i>      | 1184538_1 | 0.268    |
| <i>DOT1L</i>     | 1187770_1 | 0.283    |
| <i>SUV39H2</i>   | 1180721_1 | 0.293    |
| <i>DOT1L</i>     | 1193406_1 | 0.302    |
| <i>SMYD2</i>     | 1179149_1 | 0.31     |
| <i>SMYD3</i>     | 1193737_1 | 0.35     |
| <i>EZH1</i>      | 1188286_1 | 0.439    |
| <i>SETDB1</i>    | 1176475_1 | 0.475    |
| <i>C14orf169</i> | 1178450_1 | 0.496    |
| <i>ASH1L</i>     | 1184795_1 | 0.62     |
| <i>SETD4</i>     | 1178543_1 | 0.896    |
| <i>WHSC1</i>     | 1185307_1 | 0.942    |

\* P-values were obtained by log-rank test.

Supplementary Table 3: Univariate and multivariate Cox regression analysis of overall survival

| Variable                              | Univariate |                       |                 | Multivariate |                       |                 |
|---------------------------------------|------------|-----------------------|-----------------|--------------|-----------------------|-----------------|
|                                       | <i>n</i>   | HR (95% CI)           | <i>P</i> -value | <i>n</i>     | HR (95% CI)           | <i>P</i> -value |
| Gender (Male or Female)               | 342        | 1.336 (0.793 - 2.249) | 0.276           | 342          |                       |                 |
| Age (>60 years or not)                | 342        | 0.897 (0.592 - 1.359) | 0.608           |              |                       |                 |
| AFP (>300 ng/mL or not)               | 342        | 1.682 (1.204 - 2.35)  | 0.002           |              |                       |                 |
| Tumor size (>5 cm or not)             | 342        | 2.053 (1.471 - 2.865) | <0.001          |              | 1.966 (1.379 - 2.803) | <0.001          |
| BCLC stage (B/C/D or 0/A)             | 342        | 1.816 (1.285 - 2.566) | 0.001           |              | 1.46 (1.023 - 2.085)  | 0.037           |
| <i>PRMT1</i> signature (LPC vs. HPC*) | 342        | 1.867 (1.329 - 2.621) | <0.001          |              | 1.612 (1.127 - 2.306) | 0.009           |

\* Predicted outcome in Figure 5 was used for analysis [low *PRMT1* cluster (LPC) or high *PRMT1* cluster (HPC)].

Abbreviations: HR, hazard ratio; CI, confidence interval; AFP, alpha-fetoprotein; BCLC, Barcelona Clinic Liver Cancer.

Supplementary Table 4: Sequences for siRNA

| Gene name     | sequence                                                    |
|---------------|-------------------------------------------------------------|
| Control siRNA | 5'-AUGAACGUGAAUUGCUC AATT-3'<br>5'-UUGAGCAAUUCACGUUCAUTT-3' |
| PRMT1 siRNA   | 5'-GAGUUCACACGCGUGCCACATT-3'<br>5'-UGUGGCAGCGUGUGAACUCTT-3' |
| CDKN1A siRNA  | 5'-CUGUACUGUUCUGUGUCUUTT-3'<br>5'-AAGACACAGAACAGUACAGTT-3'  |
